# BioNetComp: a Python package for biological network development and comparison

Lucas M. Carvalho<sup>a,b</sup>

a. Department of Genetics, Evolution, Microbiology, and Immunology, Institute of Biology, University of Campinas, Campinas, SP, 13083-862, Brazil.

b. Center for Computing in Engineering and Sciences, UNICAMP, Campinas, São Paulo, 13083-861, Brazil.

## Abstract

Due to the large generation of omics data on a large scale in the last few years, the extraction of information from biological data has become more complex and its integration or comparison as well. One of the ways to represent interactions of biological data is through networks, which summarize information on interactions between their nodes through edges. The comparison of two biological networks using network metrics, biological enrichment, and visualization consists of data that allows us to understand differences in the interactomes of contrasting conditions. We describe BioNetComp, a python package to compare two different interactomes through different metrics and data visualization without the need for a web platform or software, just by command-line. As a result, we present a comparison made between the interactomes generated from the differentially expressed genes at two different points during a typical bioethanol fermentation. BioNetComp is available at [github.com/lmigueel/BioNetComp](https://github.com/lmigueel/BioNetComp).

**Keywords:** network, biological network, PPI, bioinformatics

## 43 Introduction

44

45 Networks are used to represent complex systems with relationships between their  
46 components. The networks are shown using a mathematical representation called a  
47 graph. A graph is made up of vertices and edges, and its application in several areas  
48 has already been observed, including in biological science (Zhang, P., & Itan, Y.,  
49 2019; Liu, C. et al., 2020; Mulder, N. J. et al., 2014). A biological network is  
50 generated using associations already known or predicted between components of a  
51 biological system, such as genes, proteins, metabolites, among others. With the  
52 availability of omics data on a large scale, both for model and non-model organisms,  
53 it was easier to study the interactions between biological systems, either through  
54 laboratory experiments or bioinformatics techniques. The comparative study of the  
55 interaction of these biological systems, represented by an interactome network,  
56 provides new insights into the understanding of systems biology.

57

58 There are several interaction databases of system components, such as MINT  
59 (Licatta, L et. al.,2012), DIP (Xenarios, I. et al., 2002), BIOGRID (Oughtred, R. et al.,  
60 2019), and STRING (Szklarczyk, D. et al., 2019). The latter has a database with  
61 more interactions and these are cured manually or are generated through  
62 bioinformatics techniques, such as coexpression and text mining (Harrington, E. D.,  
63 Jensen, L. J., & Bork, P., 2008). Also, STRING has a web application that is limited  
64 to receiving a list of up to 2000 genes or proteins and generating an interactome.  
65 This generated network can be opened in software that performs network analysis,  
66 such as Cytoscape (Shannon, P. et al., 2003). It has modules to enable the  
67 execution of a general analysis of the network, such as basic metrics and  
68 enrichments. The comparison between two networks can also be performed by  
69 Cytoscape, through the Dynet package (Goenawan, I. H., Bryan, K., & Lynn, D. J.,  
70 2016), but it has a difficulty in dealing with extremely dense networks and generating  
71 reports. There is also a web application, called NetConfer (Nagpal, S. et al., 2020),  
72 which performs the comparison of several networks at the same time using already  
73 known metrics, but networks are not generated automatically.

74

75 In this article, we present BioNetComp, a python package that compares two  
76 biological networks and their metrics. Also, BioNetComp can be executed on the  
77 command line, and it generates reports that can be used in various software that  
78 interpret networks.

79

80

81

82

83

84

85

## 86 **Material and Methods**

87

### 88 *Dataset*

89

90 We assessed the performance of BioNetComp through a publicly available dataset  
91 (Carvalho-Netto, O. V. *et al.*, 2015) that allows comparing the interactomes  
92 generated over a typical industrial fermentation of bioethanol, also called 1G  
93 fermentation. The complete dataset of RNA-Seq reads can be accessed in SRA  
94 accession SRA057038.

95

### 96 *RNA-Seq analysis*

97

98 For each RNA-seq library, reads were aligned to *S. cerevisiae* S288c genes  
99 ([www.yeastgenome.org](http://www.yeastgenome.org)) using the kallisto v1.0.7 software (Bray, N. L. *et al.*, 2016).  
100 The differential expression analysis was performed using the DESeq2 v1.30.1  
101 package (Love, M.I. *et al.*, 2014) which has an option to deal with datasets without  
102 biological replicates.

103

### 104 *Network development*

105

106 Interactions were requested in the STRING v11 database through an API. Networks  
107 and metrics were generated using the networkX v2.5.1 package (Hagberg, A. A. *et al.*,  
108 2008).

109

### 110 *Stress tests*

111

112 Stress tests were implemented in Python 3.8.5 and executed in a Ubuntu Server on  
113 Intel(R) Xeon(R) CPU E5-2420 (2.20 GHz), 48 GB of RAM. Each instance was  
114 executed 10 times and the mean was used in further analysis. The use of memory  
115 throughout the BioNetComp execution was verified by the memory profiler package  
116 ([https://github.com/pythonprofilers/memory\\_profiler](https://github.com/pythonprofilers/memory_profiler)).

117

### 118 *Data availability*

119

120 The source code for BioNetComp is available in an online repository  
121 ([github.com/lmigueel/BioNetComp](https://github.com/lmigueel/BioNetComp)).

122

123

124

125

126

127

128

## 129 **Workflow**

130

131 BioNetComp contains a flowchart designed to provide a structured comparative  
132 approach between two biological networks through the STRING database, as well as  
133 metrics, comparative reports and network visualizations.

134

135 From the entry of two lists of proteins or genes and the taxid of the organism under  
136 study, we execute the pipeline described in Figure 1. First, a request is generated in  
137 the STRING database, limited to 2000 proteins/genes, to return the interactions  
138 described in each biological network. Subsequently, from the interaction pool, the  
139 network is generated through the NetworkX package. Finally, comparative reports  
140 and a final network are generated, and colored from the presence or absence  
141 between the networks. For more detailed information, access the repository:  
142 [github.com/lmigueel/BioNetComp](https://github.com/lmigueel/BioNetComp).

143

144 The reports provided by BioNetComp from two lists of genes or proteins are:

145

- 146 1. A text file containing the list of nodes and total edges, differentiated by color and  
147 presence and absence in the network;
- 148 2. A text file containing exclusive nodes of each network and those in common;
- 149 3. Exclusive networks and a final network plot, containing comparative information;
- 150 4. Network plot generated only by exclusive edges of each biological network;
- 151 5. Comparative graphics of the number of nodes and edges;
- 152 6. Exclusive comparison charts, such as the betweenness and closeness centrality  
153 boxplots;
- 154 7. Degree histogram chart and its boxplot for each network;
- 155 8. Enrichment of the entire network, but also exclusive and common nodes.
- 156 9. Betweenness and closeness centrality gene ranking;
- 157 10. Jaccard coefficient between networks applied to nodes and edges for  
158 dissimilarity observations.

159

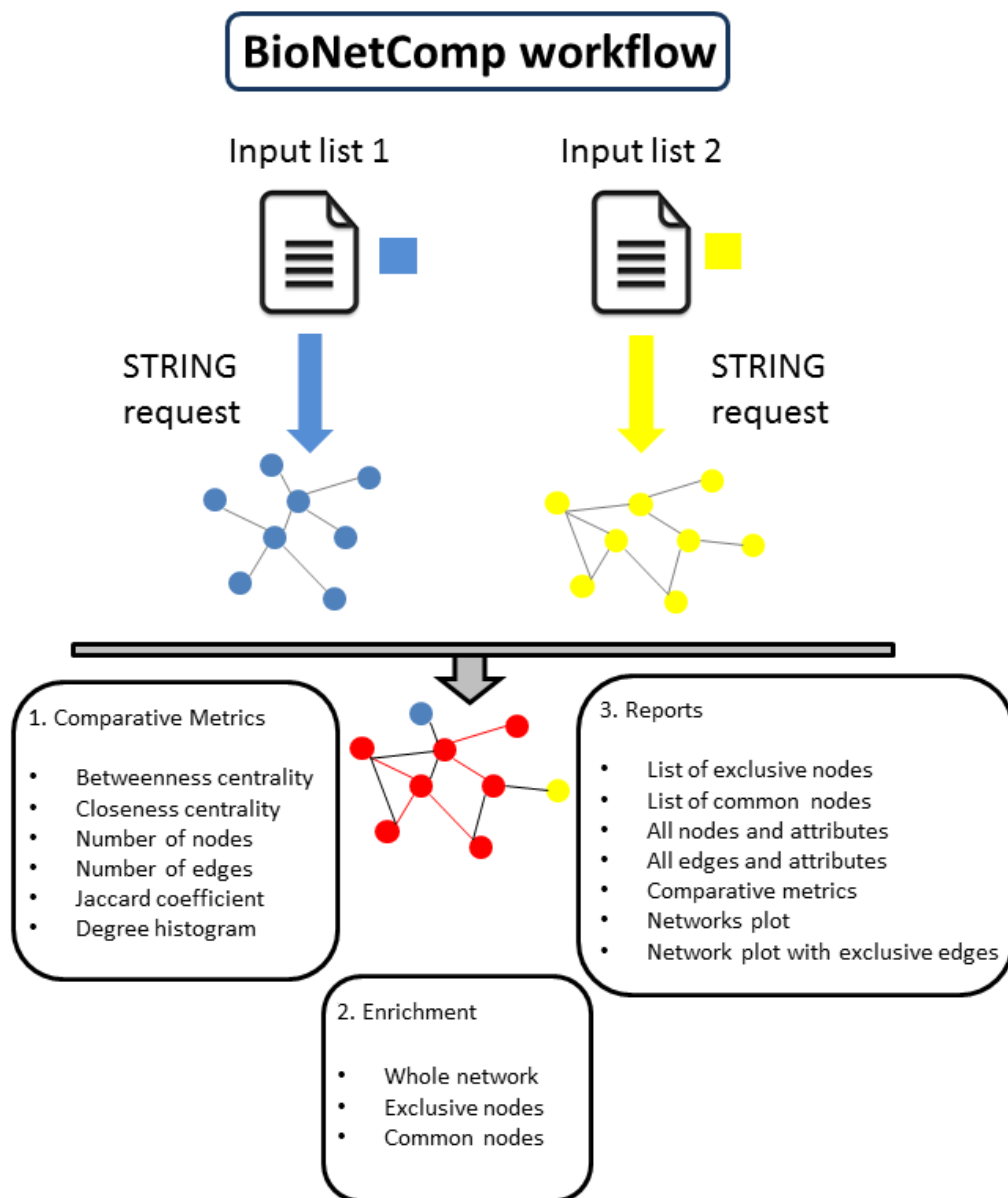

160

161 Figure 1. BioNetComp workflow. From two lists of genes or proteins, a request in the  
162 STRING database is carried out and the interactions are stored. From this, biological  
163 networks are generated. The comparison is made using several metrics and includes  
164 comparative charts. Biological enrichment of exclusive and similar nodes is also  
165 carried out. Finally, a final report is generated, including the graphs of each network  
166 and a final network, containing all the information about exclusivity and similarity  
167 between nodes and edges.

168

169

170

171

172

173

#### 174 *Network development*

175

176 The first step of BioNetComp is to make requests in the STRING database through  
177 its API, which enables you to get the data without using the graphical user interface.  
178 These requests are stored in a data frame and an edge hash, which stores the  
179 interactions found. The requests depend on taxid number, which is a required option  
180 in our package (*--taxid*). If the number of proteins or genes exceeds 2000, a warning  
181 message will be displayed.

182

183 The interactions found in the STRING database are transformed into a data frame  
184 that can be read by the NetworkX package through the *from\_pandas\_edgelist()*  
185 module. With the network graphs, all comparative metrics can be generated. The  
186 user can change the threshold value for STRING interaction score using the *--*  
187 *threshold* option, which has a default value of 0.40. For details about STRING  
188 interaction score calculation access <http://version10.string-db.org/help/faq/>.

189

190 The module present in BioNetComp for Network development is called  
191 *network\_development()*.

192

193

#### 194 *Comparative Metrics*

195

196 With the networks, we can calculate their basic metrics and compare them. The first  
197 step is to compare the total nodes and edges of each network. A bar chart is  
198 generated.

199

200 Some other network metrics are also generated and compared. The first is the  
201 closeness centrality, which indicates how close a node is to all others in the network.  
202 The second metric is the betweenness centrality, which measures the importance of  
203 each node in passing information, that is, it deals with the identification of hub genes.  
204 Finally, the histogram degree for each network is produced. The comparative  
205 boxplot for these metrics is also generated by BioNetComp.

206

207 The final report for each network contains (i) number of vertices; (ii) the number of  
208 edges; (iii) whether the network is connected or not; (iv) average path length and  
209 average diameter if the network is connected; (v) network diameter of the largest  
210 component; (vi) average clustering; (vii) node with max closeness centrality; and (viii)  
211 node with max betweenness centrality.

212

213

214

215

216

## 217 *Network visualization*

218

219 In addition to the comparative charts for each metric mentioned in the previous  
220 section, BioNetComp generates the network plots. The nodes that have the highest  
221 betweenness centrality value are highlighted with a larger size due to their  
222 importance in the network. The graph contains a color scale, indicating the value of  
223 the degree, therefore, nodes with a greater tendency to be a hub are also  
224 highlighted. Thus, through this visualization technique, we highlight essential nodes  
225 in the network. We use the spring layout of the NetworkX package, as it can better  
226 sample the nodes through the optimal distance between nodes.

227

228 The module present in BioNetComp for Comparative metrics and Network  
229 visualization is called *comparative\_metrics()*.

230

231

## 232 *Network Enrichment*

233

234 The network enrichment is performed through requests using the STRING API. The  
235 user can change the FDR cut-off value for enrichment using the *--fdr* option, which  
236 has a default value of 0.05.

237

238 The module present in BioNetComp for network enrichment is called  
239 *network\_enrichment()*.

240

241

## 242 *Network Comparison*

243

244 The comparison between the networks is carried out in a simple, but practical and  
245 objective way. First, reports are generated containing the exclusive nodes of each  
246 network and the nodes in common. Also, a report of the edges of the final network is  
247 generated, containing the edges that are shared by both networks and the exclusive  
248 ones. The attributes of each edge are also reported. The enrichment of each node  
249 group is also reported, so we can identify the unique and common biological  
250 processes.

251

252 With the basic comparison metrics generated, we calculate the Jaccard coefficient  
253 for nodes and edges. This coefficient measures the similarity between the observed  
254 metrics. At the end of this step, a bar chart is generated containing the value of the  
255 Jaccard coefficient for the nodes and edges.

256

257 The final plot of the network contains information that allows a clear visual  
258 comparison. The nodes that are common to both networks, exclusive of the first  
259 network (*--in1*) and exclusive of the second network (*--in2*) will be colored by red,

260 blue and yellow, respectively. Also, the degree of each node delimits the size of the  
261 node in the final network plot, allowing visualization of the hub nodes.

262

263 The module present in BioNetComp for network comparison is called  
264 *compare\_networks()*.

265

266 The reports names always take into account the data entry. The label 'network1' will  
267 be assigned to the list of genes or proteins in *--in1* option, while the label 'network2'  
268 will be assigned to the list present in the *--in2* option. All reports will be generated  
269 within the folder present in the *--output\_folder* option.

270

## 271 **Results and discussion**

272

273 *Case of study: Understanding differences between differentially expressed genes*  
274 *during bioethanol fermentation*

275

276 Carvalho-Netto, O. V. *et al.* performed an RNA-Seq analysis during typical  
277 bioethanol fermentation. The collected points were 1h, 4h, 7h, 10h, 12h, and 15h  
278 during the fermentation. Then, the paired differential expression of all points was  
279 performed based on the first time-point (1h). The results of measured metabolites  
280 presented by the authors show that C6 sugar (glucose) is consumed within 12 hours  
281 of fermentation, with the highest consumption rate between 7h and 10h. Also,  
282 throughout the fermentation, glycerol is produced. We will perform the comparison of  
283 the interactome from differentially expressed genes of 4h *versus* 1h and 12h *versus*  
284 1hr comparisons. The chosen points are contrasting both in the production of ethanol  
285 and the consumption of glucose, which is more accentuated at the beginning of  
286 fermentation.

287

288 The first network (network1) was generated from the 306 differential genes between  
289 4h and 1h. The second network (network2), on the other hand, was generated from  
290 1559 differential genes between 12h and 1hr. We observed a difference between the  
291 number of network final nodes (279 vs 1559) and edges (2778 vs 32289). We also  
292 note that network1 is disconnected and network2 is connected, which ends up  
293 causing a difference in betweenness centrality (Fig. 2A), closeness centrality (Fig.  
294 2B), and degree distribution (Fig. 2C-D). The second group of differential genes  
295 (network2) generates a connected network, and this causes the value of closeness  
296 centrality to increase, as shown in Fig. 2B, and higher values of the degree  
297 distribution (Fig. 2D). We also note that there is a very connected group in the first  
298 group of differential genes (network1), which can be seen highlighted in yellow in  
299 Fig. 2E. This perturbation causes two peaks in the degree histogram (Fig. 2C) and  
300 ends up increasing the value of betweenness centrality (Fig. 2A). The RPS31 gene  
301 is the node with the highest value of closeness centrality in both networks, and its



302 main role is to act on ribosomal biogenesis and assembly. A dense final network is  
303 shown in Figure 3.

304  
305  
306  
307  
308

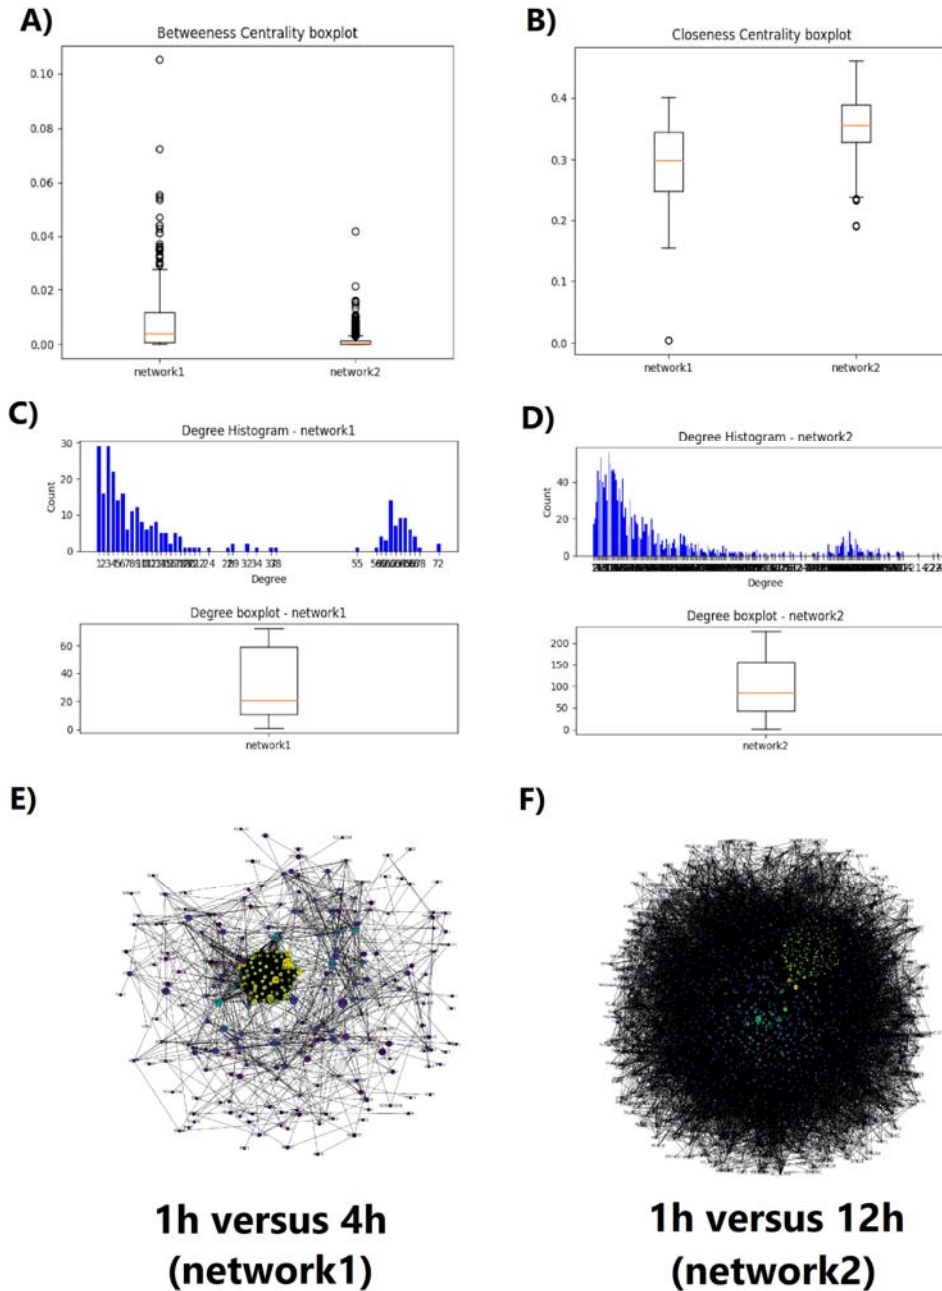

309  
310  
311  
312

Figure 2. Some of the final results obtained by BionetComp in the comparison of the interactome generated through the differentially expressed genes of the points 1h versus 4h and 1h versus 12h in the typical bioethanol fermentation described by

313 Carvalho-Netto et. al., 2015. (A) Comparative boxplot of betweenness centrality. (B)  
314 comparative boxplot of closeness centrality. (C) Degree histogram and boxplot for  
315 the first group of genes. (D) Degree histogram and boxplot for the second group of  
316 genes. (E) The final network plot for the first group of genes. (F) The final network  
317 plot for the second group of genes.

318

319 Regarding the results of the enrichment of the nodes in common between the  
320 networks, we note that there are many enriched GO processes (p-value  $\leq 0.05$ )  
321 involving in ribosomal roles (GO: 0042255, GO: 0042254, GO: 0042273, GO:  
322 0000027, and GO: 0042274), related to processes of transcription and cellular  
323 organization (GO: 0006405, GO: 0010467, GO: 0051029 and GO: 0031505) and  
324 metabolic processes and stress (GO: 0034599 and GO: 0006083). The exclusive  
325 nodes of network1 have enriched GO processes (p-value  $\leq 0.05$ ) related to  
326 glutamate metabolism (GO: 0006536, GO: 0009084 and GO: 0006537), glycolysis,  
327 and pentose phosphate (GO: 0019682, GO: 0019323, GO: 0019693), repair (GO:  
328 0000730, GO: 0090735 and GO: 0000725) and mainly in metabolic processes  
329 involving oxidative stress and NAD / NADH (GO: 0034354, GO: 0034627, GO:  
330 0019674, GO: 0006739 and GO: 0051252). These results from network1 show that  
331 yeast, at the beginning of fermentation, already suffers from a very large redox  
332 imbalance in the industry, which is also being corrected by glutamate processes but  
333 has important metabolic processes to produce ethanol. The exclusive nodes of  
334 network2 have many enriched GO processes (p-value  $\leq 0.05$ ) related to cellular  
335 respiration (GO: 0022904, GO: 0045333, GO: 0042775, GO: 0009060, GO:  
336 0006122, and GO: 0006121), and autophagy and starvation (GO: 0000422, GO:  
337 0009267, GO: 1903008, GO: 0000422, GO: 0061912). This shows that the yeast, at  
338 the 12h fermentative point, tries to overcome the redox imbalance by activating the  
339 mitochondrial process, but enters a state of starvation due to the lack of sugar.

340

341 Pathway enrichment analysis over common nodes shows metabolic pathways  
342 related to bioethanol fermentation, such as Glyoxylate and dicarboxylate  
343 metabolism, Glycolysis/Gluconeogenesis, beta-Alanine metabolism, Fatty acid  
344 elongation, and Ribosome. However, network2 has metabolic processes related to  
345 the end of fermentation and starving beginning, such as Autophagy, Citrate cycle  
346 (TCA cycle), Meiosis, DNA replication, Oxidative phosphorylation, and Starch and  
347 sucrose metabolism. Network1 has not any exclusive pathway enriched.

348

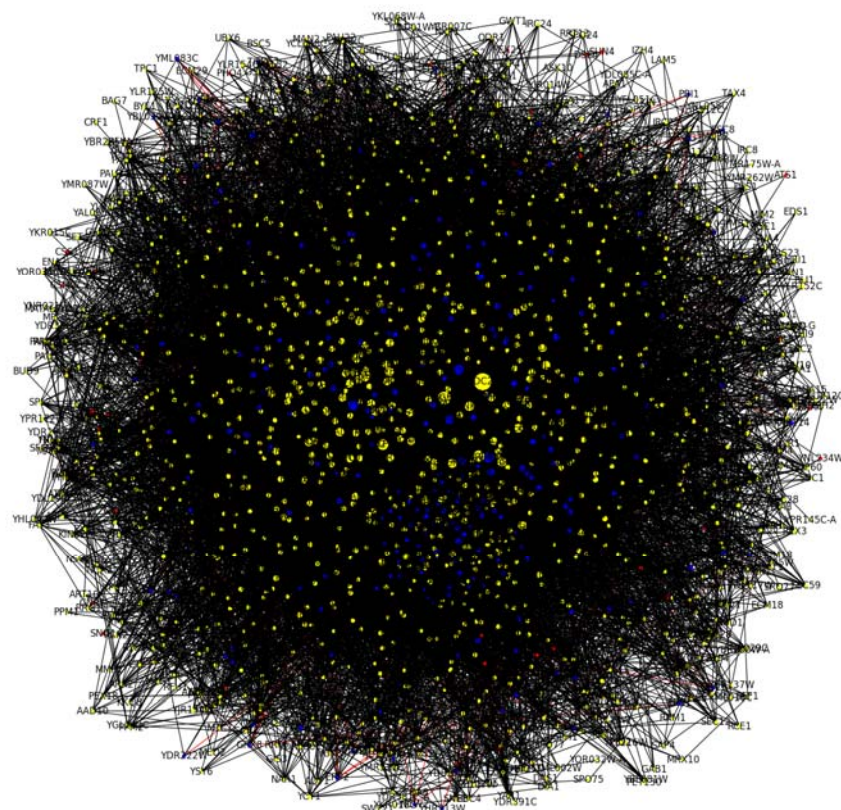

349

350 Figure 3. Final network plotted by BioNetComp. Nodes in red, blue, and yellow  
351 represent the intersection nodes, exclusive nodes of network1, and exclusive nodes  
352 of network2, respectively. This network is generated by the report files  
353 edge\_report.txt e node\_report.txt.

354

355 All results generated by the BioNetComp package for this comparison can be found  
356 in the Supplementary Material A.

357

### 358 *Stress tests*

359

360 To test the limits of BioNetComp and evaluate its behavior, a stress test was carried  
361 out for a different number of genes/proteins in each network. Two random networks  
362 were generated from *Saccharomyces cerevisiae* genes. The total number of genes  
363 present in each biological network varies from 200 to 2000. The time spent was  
364 calculated during the execution of the four essential steps of BioNetComp: (i) Step1:  
365 STRING API request; (ii) Step2: Network development, Comparative metrics, and  
366 Network Visualization; (iii) Step3: Network enrichment; (iv) Step4: Network  
367 comparison. The results are summarised in Figure 4.

368

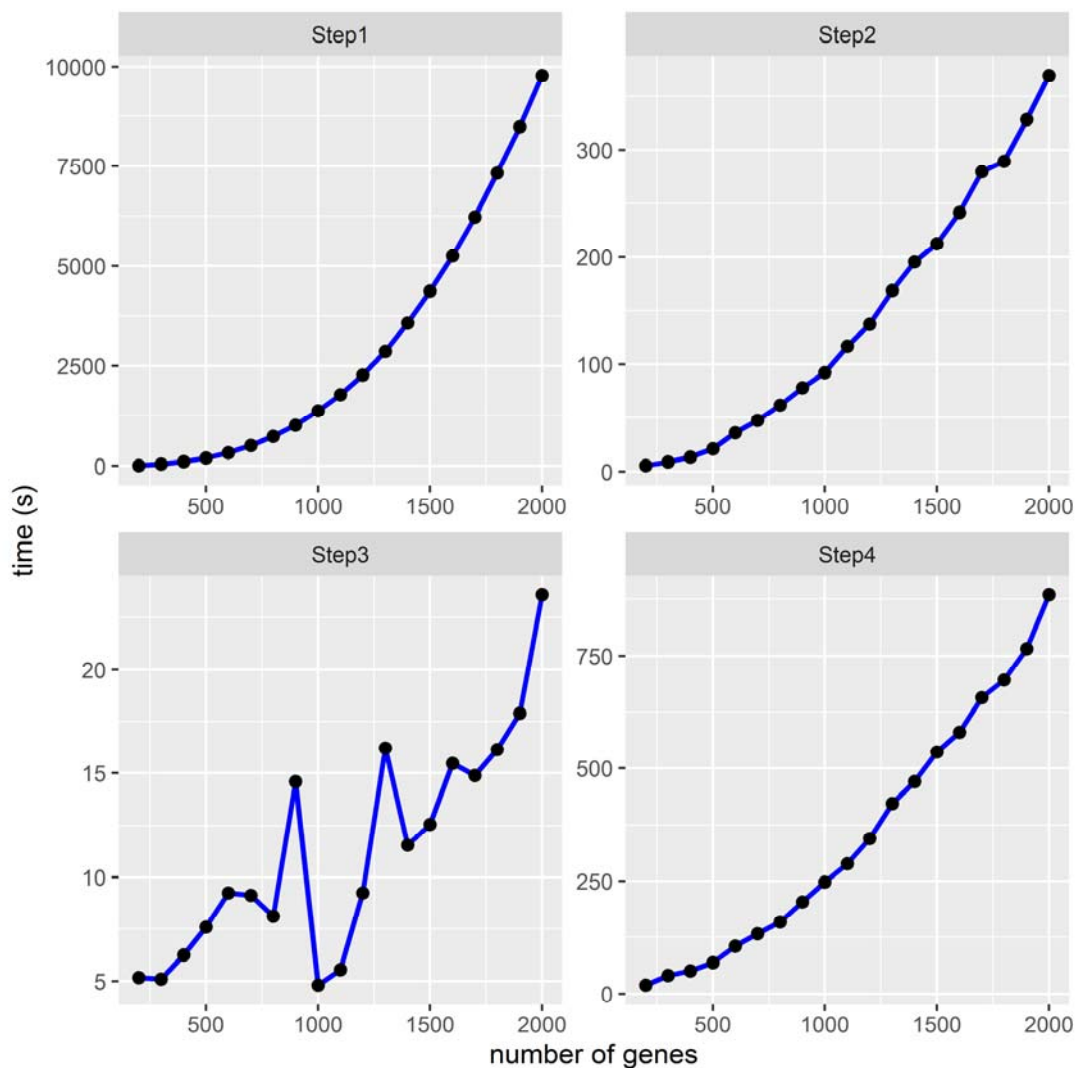

369

370 Figure 4. Stress test during BioNetComp execution. The x-axis represents the total  
371 number of genes in each biological network selected randomly from the *S. cerevisiae*  
372 genes, which varies between 200 and 2000 nodes. The y-axis shows the time spent  
373 on each processing step. The steps are: (i) Step1: STRING API request; (ii) Step2:  
374 Network development, Comparative metrics, and Network Visualization; (iii) Step3:  
375 Network enrichment; (iv) Step4: Network comparison.

376

377 The use of memory throughout the execution of BioNetComp was verified by the  
378 memory profiler package. We note that the highest memory usage (in Mb) occurred  
379 when both networks have 2000 nodes and was limited to the total usage of 500 Mb.  
380 All memory usage results are available in the Supplementary Material B.

381

382

383

384

385

386

## 387 **Conclusions**

388

389 Given the established importance of interpreting biological information through  
390 networks, there is also an inherent need for tools that can compare and visualize  
391 them more objectively and clearly. The general intention behind the development of  
392 BioNetComp is to generate results quickly, easy and not dependent on web  
393 platforms or software. Despite the limit for very dense networks, the metrics  
394 generated in the reports and the comparative graphs are essential to extract  
395 conclusions from the interactomes. The command-line use of BioNetComp is  
396 expected to facilitate the automation of processes that need to extract information  
397 from biological networks.

398

399

400

## 401 **Funding**

402

403 This work was financed by the Center for Computational Engineering and Sciences -  
404 FAPESP/Cepid (2013/08293-7) and the São Paulo Research Foundation (FAPESP)  
405 through grant 2019/12914-3.

## 406 **Ethics declarations**

407

408 Not applicable

409

410

## 411 **References**

412

413 Bray, Nicolas L., et al. "Near-optimal probabilistic RNA-seq quantification." *Nature*  
414 *biotechnology* 34.5 (2016): 525-527.

415

416 Carvalho-Netto, Osmar V., et al. "Saccharomyces cerevisiae transcriptional  
417 reprogramming due to bacterial contamination during industrial scale bioethanol  
418 production." *Microbial cell factories* 14.1 (2015): 1-13.

419

420 Goenawan, Ivan H., Kenneth Bryan, and David J. Lynn. "DyNet: visualization and  
421 analysis of dynamic molecular interaction networks." *Bioinformatics* 32.17 (2016):  
422 2713-2715.

423

424 Hagberg, Aric, Pieter Swart, and Daniel S Chult. Exploring network structure,  
425 dynamics, and function using NetworkX. No. LA-UR-08-05495; LA-UR-08-5495. Los  
426 Alamos National Lab.(LANL), Los Alamos, NM (United States), 2008.

427

428 Harrington, Eoghan D., Lars J. Jensen, and Peer Bork. "Predicting biological  
429 networks from genomic data." *FEBS letters* 582.8 (2008): 1251-1258.

430

431 Licata, L., Briganti, L., Peluso, D., Perfetto, L., Iannuccelli, M., Galeota, E., ... &  
432 Cesareni, G. (2012). MINT, the molecular interaction database: 2012 update. *Nucleic  
433 acids research*, 40(D1), D857-D861.

434

435 Liu, Chuang, et al. "Computational network biology: data, models, and applications."  
436 *Physics Reports* 846 (2020): 1-66.

437

438 Love, Michael I., Wolfgang Huber, and Simon Anders. "Moderated estimation of fold  
439 change and dispersion for RNA-seq data with DESeq2." *Genome biology* 15.12  
440 (2014): 1-21.

441

442 Mulder, Nicola J., et al. "Using biological networks to improve our understanding of  
443 infectious diseases." *Computational and structural biotechnology journal* 11.18  
444 (2014): 1-10.

445

446 Nagpal, Sunil, et al. "NetConfer: a web application for comparative analysis of  
447 multiple biological networks." *BMC biology* 18 (2020): 1-12.

448

449 Oughtred, Rose, et al. "The BioGRID interaction database: 2019 update." *Nucleic  
450 acids research* 47.D1 (2019): D529-D541.

451

452 Shannon, Paul, et al. "Cytoscape: a software environment for integrated models of  
453 biomolecular interaction networks." *Genome research* 13.11 (2003): 2498-2504.

454

455 Szklarczyk, Damian, et al. "STRING v11: protein–protein association networks with  
456 increased coverage, supporting functional discovery in genome-wide experimental  
457 datasets." *Nucleic acids research* 47.D1 (2019): D607-D613.

458

459 Xenarios, I., Salwinski, L., Duan, X. J., Higney, P., Kim, S. M., & Eisenberg, D.  
460 (2002). DIP, the Database of Interacting Proteins: a research tool for studying  
461 cellular networks of protein interactions. *Nucleic acids research*, 30(1), 303-305.

462

463 Zhang, Peng, and Yuval Itan. "Biological network approaches and applications in  
464 rare disease studies." *Genes* 10.10 (2019): 797.

465

466

467

468
